# Supplementary material
Source: publisher site journal article supplement (https://www.spandidos-publications.com/7429/downloadSupplementary)
Supplement: Supplementary file 1 [file downloadSupplementary]

Table SI. Subgroup analysis of the progression-free survival of 20 patients who received furmonertinib monotherapy.

| Subgroup                                         | Overall    | HR (95% CI)        | P-value            |
|--------------------------------------------------|------------|--------------------|--------------------|
| Age (>65 years)                                  | 11 (55.0)  | 1.43 (0.44-4.64)   | 0.555              |
| Sex (male)                                       | 7 (35.0)   | 0.96 (0.30-3.04)   | 0.942              |
| Surgical history (yes)                           | 7 (35.0)   | 0.84 (0.26-2.68)   | 0.766              |
| Organ metastasis                                 |            |                    |                    |
| Brain (yes)                                      | 5 (25.0)   | 0.35 (0.04-2.71)   | 0.312              |
| Leptomeninges (yes)                              | 2 (10.0)   | 0.44 (0.06-3.50)   | 0.441              |
| Lung (yes)                                       | 9 (45.0)   | 0.32 (0.08-1.23)   | 0.097              |
| Pleura (yes)                                     | 9 (45.0)   | 0.80 (0.25-2.59)   | 0.708              |
| Adrenal glands (yes)                             | 2 (10.0)   | 1.25 (0.15-10.24)  | 0.835              |
| Bone (yes)                                       | 8 (40.0)   | 0.82 (0.26-2.59)   | 0.729              |
| EGFR mutation status at diagnosis                |            |                    |                    |
| EGFR 19del (yes)                                 | 11 (55.0)  | 1.07 (0.34-3.42)   | 0.904              |
| EGFR 211859R (yes)                               | 8 (40.0)   | 0.93 (0.29-2.97)   | 0.904              |
| Third-generation EGFR-TKI (yes)                  | 13 (65.0)  | 1.13 (0.34-3.78)   | 0.842              |
| Osimertinib (yes)                                | 12 (60.0)  | 1.22 (0.36-4.02)   | 0.765              |
| Treatment line before receiving furmonertinib, n | 20 (100.0) | 1.96 (1.195-3.197) | 0.008 <sup>a</sup> |

<sup>a</sup>P<0.05. HR, hazard ratio; CI, confidence interval; EGFR, epidermal growth factor receptor; TKI, tyrosine kinase inhibitor.
